# Supplementary material for: Interlaboratory Performance of a Real-Time PCR Method for Detection of Ceratocystis platani, the Agent of Canker Stain of Platanus spp
Source: MDPI journal article supplement (doi:10.3390/jof8080778), 2022-07-26
Supplement: s1 [file s1]

Title:

Interlaboratory performance of a Real-Time PCR method for detection of *Ceratocystis platani*, the agent of canker stain of *Platanus* spp.

Journal name:

Journal of Fungi

Authors:

Angela Brunetti, Kurt Heungens, Jacqueline Hubert, Renaud Ioos, Gian Luca Bianchi, Francesca De Amicis, Anne Chandelier, Sietse Van Der Linde, Ana Perez-Sierra, Valeria Gualandri, Maria Rosaria Silletti, Vito Nicola Trisciuzzi, Silvia Rimondi, Tiziana Baschieri, Elio Romano, Valentina Lumia, Marta Luigi, Francesco Faggioli, and Massimo Pilotti

Corresponding author:

Massimo Pilotti

Affiliation:

Institution: Council for Agricultural Research and Economics; Department: Research Center for Plant Protection and Certification (CREA-DC) - Via C. G. Bertero 22, 00156 Rome, Italy

E-mail address:

[massimo.pilotti@crea.gov.it](mailto:massimo.pilotti@crea.gov.it)

**Table S3** - Detection of *Ceratocystis platani* with morphological/biological assays in the plane tree wood samples collected for the test performance study (TPS).

|                                                             | Microscope<br>assay | Moist<br>chamber | Carrot<br>assay | Isolation | Bait-plant<br>assay |
|-------------------------------------------------------------|---------------------|------------------|-----------------|-----------|---------------------|
| Naturally- <i>C.platani</i> -<br>infected tree 1 (NI.1)     | +                   | -                | +               | -         | N.P.                |
| Naturally- <i>C.platani</i> -<br>infected tree 2 (NI.2)     | +                   | -                | +               | +         | N.P.                |
| Naturally- <i>C.platani</i> -<br>infected tree 3 (NI.3)     | +                   | +                | +               | +         | N.P.                |
| Artificially- <i>C.platani</i> -<br>infected tree 1 (AI.1)  | -                   | -                | -               | -         | +                   |
| Artificially- <i>C.platani</i> -<br>infected tree 2 (AI.2)  | -                   | -                | -               | -         | +                   |
| Artificially- <i>C.platani</i> -<br>infected tree 3 (AI.3)  | -                   | -                | -               | -         | +                   |
| Artificially- <i>C.platani</i> -<br>infected tree 4 (AI.4)  | -                   | -                | -               | -         | +                   |
| Artificially- <i>C.platani</i> -<br>infected tree 5 (AI.5)  | -                   | -                | -               | -         | +                   |
| Artificially- <i>C.platani</i> -<br>infected tree 6 (AI.6)  | -                   | -                | -               | -         | +                   |
| Healthy tree 1 (H.1)                                        | -                   | -                | -               | -         | N.P.                |
| Healthy tree 2 (H.2)                                        | -                   | -                | -               | -         | N.P.                |
| Healthy tree 3 (H.3)                                        | -                   | -                | -               | -         | N.P.                |
| Diseased tree 1 (D.1)<br>( <i>C. platani</i> -non-infected) | -                   | -                | -               | -         | -                   |
| Diseased tree 2 (D.2)<br>( <i>C. platani</i> -non-infected) | -                   | -                | -               | -         | -                   |
| Diseased tree 3 (D.3)<br>( <i>C. platani</i> -non-infected) | -                   | -                | -               | -         | -                   |

N.P. = Not Performed
