# Supplementary material for: Interlaboratory Performance of a Real-Time PCR Method for Detection of Ceratocystis platani, the Agent of Canker Stain of Platanus spp
Source: MDPI journal article supplement (doi:10.3390/jof8080778), 2022-07-26
Supplement: s1 [file s1]

Title:

Interlaboratory performance of a Real-Time PCR method for detection of *Ceratocystis platani*, the agent of canker stain of *Platanus* spp.

Journal name:

Journal of Fungi

Authors:

Angela Brunetti, Kurt Heungens, Jacqueline Hubert, Renaud Ioos, Gian Luca Bianchi, Francesca De Amicis, Anne Chandelier, Sietse Van Der Linde, Ana Perez-Sierra, Valeria Gualandri, Maria Rosaria Silletti, Vito Nicola Trisciuzzi, Silvia Rimondi, Tiziana Baschieri, Elio Romano, Valentina Lumia, Marta Luigi, Francesco Faggioli, and Massimo Pilotti

Corresponding author:

Massimo Pilotti

Affiliation:

Institution: Council for Agricultural Research and Economics; Department: Research Center for Plant Protection and Certification (CREA-DC) - Via C. G. Bertero 22, 00156 Rome, Italy

E-mail address:

[massimo.pilotti@crea.gov.it](mailto:massimo.pilotti@crea.gov.it)

**Table S2** - Scheduled activities of the organizing laboratory (OL = Z) and the participating laboratories (PL) within the test performance study (TPS) for *Ceratocystis platani* detection.

| Activities                          | I step:<br>Establish the best<br>annealing/extension<br>time                               | II step:<br>The stability test                                                                                             | III step:<br>The standard curves<br>( <i>sensu strictu</i> TPS)                                                                                                                          | IV step:<br>Testing unknown<br>samples ( <i>sensu strictu</i><br>TPS)                                                                                                                    | V step:<br>Analytical sensitivity                                                                                           | Real-Time PCR<br>systems used                                                      |
|-------------------------------------|--------------------------------------------------------------------------------------------|----------------------------------------------------------------------------------------------------------------------------|------------------------------------------------------------------------------------------------------------------------------------------------------------------------------------------|------------------------------------------------------------------------------------------------------------------------------------------------------------------------------------------|-----------------------------------------------------------------------------------------------------------------------------|------------------------------------------------------------------------------------|
| Participant<br>laboratories<br>(PL) |                                                                                            |                                                                                                                            |                                                                                                                                                                                          |                                                                                                                                                                                          |                                                                                                                             |                                                                                    |
| A                                   | <ul style="list-style-type: none"> <li>Taqman with Eurogentec master mix</li> </ul>        | <ul style="list-style-type: none"> <li>Taqman with Bio-Rad master mix</li> </ul>                                           | <ul style="list-style-type: none"> <li>Taqman with Bio-Rad master mix</li> <li>Taqman with Eurogentec master mix</li> </ul>                                                              | <ul style="list-style-type: none"> <li>Taqman with Bio-Rad master mix</li> <li>Taqman with Eurogentec master mix</li> </ul>                                                              | <ul style="list-style-type: none"> <li>Taqman with Bio-Rad master mix</li> <li>Taqman with Eurogentec master mix</li> </ul> | CFX96 (Bio-Rad)<br><br>StepOne Plus™ (Applied Biosystem, Thermo Fisher Scientific) |
| B                                   | <ul style="list-style-type: none"> <li>Taqman with Thermo Scientific master mix</li> </ul> | <ul style="list-style-type: none"> <li>Taqman with Bio-Rad master mix</li> </ul>                                           | <ul style="list-style-type: none"> <li>Taqman with Bio-Rad master mix</li> <li>Taqman with Thermo Scientific master mix</li> <li>SYBR Green with Thermo Scientific master mix</li> </ul> | <ul style="list-style-type: none"> <li>Taqman with Bio-Rad master mix</li> <li>Taqman with Thermo Scientific master mix</li> <li>SYBR Green with Thermo Scientific master mix</li> </ul> | <ul style="list-style-type: none"> <li>Taqman with Bio-Rad master mix</li> </ul>                                            | CFX96™ (Bio-Rad)                                                                   |
| C                                   | <ul style="list-style-type: none"> <li>Taqman with Eurogentec master mix</li> </ul>        | <ul style="list-style-type: none"> <li>Taqman with Bio-Rad master mix</li> </ul>                                           | <ul style="list-style-type: none"> <li>Taqman with Bio-Rad master mix</li> <li>Taqman with Eurogentec master mix</li> </ul>                                                              | <ul style="list-style-type: none"> <li>Taqman with Bio-Rad master mix</li> <li>Taqman with Eurogentec master mix</li> </ul>                                                              | <ul style="list-style-type: none"> <li>Taqman with Bio-Rad master mix</li> </ul>                                            | Rotor-Gene™ 6000 (Corbett, Life Science)                                           |
| D                                   | N.P. <sup>1</sup>                                                                          | <ul style="list-style-type: none"> <li>Taqman with Bio-Rad master mix</li> <li>EvaGreen with Bio-Rad master mix</li> </ul> | <ul style="list-style-type: none"> <li>EvaGreen with Bio-Rad master mix</li> </ul>                                                                                                       | <ul style="list-style-type: none"> <li>Taqman with Bio-Rad master mix</li> <li>EvaGreen with Bio-Rad master mix</li> </ul>                                                               | N.P.                                                                                                                        | Lightcycler 480 (Roche)                                                            |
| E                                   | N.P.                                                                                       | <ul style="list-style-type: none"> <li>Taqman with Bio-Rad master mix</li> <li>EvaGreen with Bio-Rad master mix</li> </ul> | <ul style="list-style-type: none"> <li>Taqman with Bio-Rad master mix</li> <li>EvaGreen with Bio-Rad master mix</li> </ul>                                                               | <ul style="list-style-type: none"> <li>Taqman with Bio-Rad master mix</li> <li>EvaGreen with Bio-Rad master mix</li> </ul>                                                               | <ul style="list-style-type: none"> <li>Taqman with Bio-Rad master mix</li> <li>EvaGreen with Bio-Rad master mix</li> </ul>  | CFX96™ (Bio-Rad)                                                                   |

| Activities                          | I step:<br>Establish the best<br>annealing/extension<br>time                                      | II step:<br>The stability test                                                                                                 | III step:<br>The standard curves<br>( <i>sensu strictu</i> TPS)                                                                                                        | IV step:<br>Testing unknown<br>samples ( <i>sensu strictu</i><br>TPS)                                                                                                  | V step:<br>Analytical sensitivity                                                                                                                                      | Real-Time PCR<br>systems used                                             |
|-------------------------------------|---------------------------------------------------------------------------------------------------|--------------------------------------------------------------------------------------------------------------------------------|------------------------------------------------------------------------------------------------------------------------------------------------------------------------|------------------------------------------------------------------------------------------------------------------------------------------------------------------------|------------------------------------------------------------------------------------------------------------------------------------------------------------------------|---------------------------------------------------------------------------|
| Participant<br>laboratories<br>(PL) |                                                                                                   |                                                                                                                                |                                                                                                                                                                        |                                                                                                                                                                        |                                                                                                                                                                        |                                                                           |
| F                                   | N.P.                                                                                              | <ul style="list-style-type: none"> <li>• Taqman with Bio-Rad master mix</li> <li>• EvaGreen with Bio-Rad master mix</li> </ul> | N.P.                                                                                                                                                                   | <ul style="list-style-type: none"> <li>• Taqman with Bio-Rad master mix</li> <li>• EvaGreen with Bio-Rad master mix</li> </ul>                                         | <ul style="list-style-type: none"> <li>• Taqman with Bio-Rad master mix</li> </ul>                                                                                     | CFX96™<br>(Bio-Rad)                                                       |
| G                                   | N.P.                                                                                              | <ul style="list-style-type: none"> <li>• Taqman with Bio-Rad master mix</li> <li>• EvaGreen with Bio-Rad master mix</li> </ul> | <ul style="list-style-type: none"> <li>• EvaGreen with Bio-Rad master mix</li> </ul>                                                                                   | <ul style="list-style-type: none"> <li>• Taqman with Bio-Rad master mix</li> <li>• EvaGreen with Bio-Rad master mix</li> </ul>                                         | <ul style="list-style-type: none"> <li>• Taqman with Bio-Rad master mix</li> </ul>                                                                                     | CFX96™<br>(Bio-Rad)                                                       |
| H                                   | <ul style="list-style-type: none"> <li>• SYBR Green with Applied Biosystems master mix</li> </ul> | <ul style="list-style-type: none"> <li>• SYBR Green with Bio-Rad master mix</li> </ul>                                         | N.P.                                                                                                                                                                   | <ul style="list-style-type: none"> <li>• SYBR Green with Applied Biosystems master mix</li> <li>• SYBR Green with Bio-Rad master mix</li> </ul>                        | <ul style="list-style-type: none"> <li>• SYBR Green with Applied Biosystems master mix</li> <li>• SYBR Green with Bio-Rad master mix</li> </ul>                        | Applied Biosystems® 7500<br>(Applied Biosystem, Thermo Fisher Scientific) |
| Z (OL) <sup>2</sup>                 | N.P.                                                                                              | N.P.                                                                                                                           | <ul style="list-style-type: none"> <li>• Taqman with Bio-Rad supermix</li> <li>• EvaGreen with Bio-Rad supermix</li> <li>• SYBR Green with Bio-Rad supermix</li> </ul> | <ul style="list-style-type: none"> <li>• Taqman with Bio-Rad supermix</li> <li>• EvaGreen with Bio-Rad supermix</li> <li>• SYBR Green with Bio-Rad supermix</li> </ul> | <ul style="list-style-type: none"> <li>• Taqman with Bio-Rad supermix</li> <li>• EvaGreen with Bio-Rad supermix</li> <li>• SYBR Green with Bio-Rad supermix</li> </ul> | CFX96™<br>(Bio-Rad)                                                       |

<sup>1</sup> N.P. = Not Performed

<sup>2</sup> The activity reported for the OL regards its participation as a PL. See the text for the activity as a OL *sensu strictu*
