# Supplementary material for: Interlaboratory Performance of a Real-Time PCR Method for Detection of Ceratocystis platani, the Agent of Canker Stain of Platanus spp
Source: J Fungi (Basel). 2022 Jul 26;8(8):778. doi: 10.3390/jof8080778 (PMC9330143; doi:10.3390/jof8080778)
Supplement: Supplementary file 1 [file jof-08-00778-s001.zip]

Archive with 7 entries (7 files):
- Spreadsheet_S1.xlsx
- Table_S1.pdf
- Table_S2.pdf
- Table_S3.pdf
- Text_S1.pdf
- Text_S2.pdf
- Text_Table_S1.pdf
