# Supplementary material for: Interlaboratory Performance of a Real-Time PCR Method for Detection of Ceratocystis platani, the Agent of Canker Stain of Platanus spp
Source: J Fungi (Basel). 2022 Jul 26;8(8):778. doi: 10.3390/jof8080778 (PMC9330143; doi:10.3390/jof8080778)
Supplement: Supplementary file 1 [file jof-08-00778-s001.zip › Spreadsheet_S1.xlsx]

## Sheet: Title
		Title: Interlaboratory performance of a Real-Time PCR method for detection of Ceratocystis platani, the agent of canker stain of Platanus spp. Journal name: Journal of Fungi Authors: Angela Brunetti, Kurt Heungens, Jacqueline Hubert, Renaud Ioos, Gian Luca Bianchi, Francesca De Amicis, Anne Chandelier, Sietse Van Der Linde, Ana Perez-Sierra, Valeria Gualandri, Maria Rosaria Silletti, Vito Nicola …
		Spreadsheet S1 - Calculations of performance parameters in the detection of blinded DNA-aliquot-samples (Das) and in testing the Limit of Detection LoD (analytical sensitivity). Assays used: Taqman(TM), EvaGreen (EG) and SYBR Green (SG) assays.

## Sheet: Blind-coded SG
	SYBR Green assay
	Qualitative data detailed at the technical replicate level							Qualitative data detailed at the Das level
	DNA aliquot samples (Das) and technical replicates	SG.Z	SG.B	SG.H1	SG.H2			DNA aliquot samples (Das)	SG.Z	SG.B	SG.H1	SG.H2
	NI.1	+	+	+	+			NI.1	+	+	+	+			N	Total number of tested technical replicates or Das
	NI.1	+	+	+	+			NI.2	+	+	+	+			N+	Number of technical replicates or Das for which the assigned value is positive, TP+FN
	NI.1	+	+	+	+			NI.3	+	+	+	+			N-	Number of technical replicates or Das for which the assigned value is negative, TN+FP
	NI.2	+	+	+	+			AI.1	+	+	+	+			TP	True positive, a positive result is obtained when a positive result is expected
	NI.2	+	+	+	+			AI.2	+	+	+	+			TN	True negative, a negative result is obtained when a negative result is expected
	NI.2	+	+	+	+			AI.3	+	+	+	+			FP	False positive, a positive result is obtained when a negative result is expected
	NI.3	+	+	+	+			AI.4	+	+	+	+			FN	False negative, a negative result is obtained when a positive result is expected
	NI.3	+	+	+	+			AI.5	+	+	+	+
	NI.3	+	+	+	+			AI.6	+	+	+	+			DSE	Diagnostic sensitivity, DSE = (NTP/N+)*100
	AI.1	+	+	+	+			H.1	-	-	-	-			DSP	Diagnostic specificity, DSP = (NTN/N-)*100
	AI.1	+	+	+	+			H.2	-	-	-	-			AC	Accuracy, AC = [(NTP+NTN)/N]*100
	AI.1	+	+	missing	+			H.3	-	-	-	-
	AI.2	+	+	+	+			D.1	-	-	-	-
	AI.2	+	+	+	+			D.2	-	-	-	+
	AI.2	+	+	+	+			D.3	-	-	-	+
	AI.3	+	+	+	+			C.P.32	+	+	+	+
	AI.3	+	+	+	+
	AI.3	+	+	+	+				SG.Z	SG.B	SG.H1	SG.H2	SG.global
	AI.4	+	+	+	+			N	16	16	16	16	64
	AI.4	+	+	+	+			N+	10	10	10	10	40
	AI.4	+	+	+	+			N-	6	6	6	6	24
	AI.5	+	+	+	+			TP	10	10	10	10	40
	AI.5	+	+	+	+			TN	6	6	6	4	22
	AI.5	+	+	+	+			FP	0	0	0	2	2
	AI.6	+	+	+	+			FN	0	0	0	0	0
	AI.6	+	+	+	+			DSE	100	100	100	100	100
	AI.6	+	+	+	+			DSP	100	100	100	66.6667	91.6667
	H.1	-	-	-	-			AC	100	100	100	87.5	96.875
	H.1	-	-	-	-
	H.1	-	-	-	-
	H.2	-	-	-	-			Reproducibility (CO)
	H.2	-	-	-	-				Number of interlaboratory pairs that gave the same results				Interlaboratory pairs of same results	Total number of interlaboratory pairs
	H.2	-	-	-	-
	H.3	-	-	-	-			DNA aliquot samples (Das)	SG.Z	SG.B	SG.H1	SG.H2
	H.3	-	-	-	-			NI.1	3	3	3	3	12	12
	H.3	-	-	-	-			NI.2	3	3	3	3	12	12
	D.1	-	-	-	-			NI.3	3	3	3	3	12	12
	D.1	-	-	-	-			AI.1	3	3	3	3	12	12
	D.1	-	-	-	-			AI.2	3	3	3	3	12	12
	D.2	-	-	-	+			AI.3	3	3	3	3	12	12
	D.2	-	-	-	+			AI.4	3	3	3	3	12	12
	D.2	-	-	-	+			AI.5	3	3	3	3	12	12
	D.3	-	-	-	+			AI.6	3	3	3	3	12	12
	D.3	-	-	-	+			H.1	3	3	3	3	12	12
	D.3	-	-	-	+			H.2	3	3	3	3	12	12
	C.P.32	+	+	+	+			H.3	3	3	3	3	12	12
	C.P.32	+	+	+	+			D.1	3	3	3	3	12	12
	C.P.32	+	+	+	+			D.2	2	2	2	0	6	12
								D.3	2	2	2	0	6	12
		SG.Z	SG.B	SG.H1	SG.H2	SY.global		C.P.32	3	3	3	3	12	12
	N	48	48	47	48	191
	N+	30	30	29	30	119					Total		180	192
	N-	18	18	18	18	72					Reproducibility (CO)			93.75
	TP	30	30	29	30	119
	TN	18	18	18	12	66
	FP	0	0	0	6	6
	FN	0	0	0	0	0
	DSE	100	100	100	100	100
	DSP	100	100	100	66.6667	91.6667
	AC	100	100	100	87.5	96.8586
	Reproducibility (CO)
		Number of interlaboratory pairs that gave the same results				Interlaboratory pairs of same results	Total number of interlaboratory pairs
	DNA aliquot samples (Das) and technical replicates	SG.Z	SG.B	SG.H1	SG.H2
	NI.1	3	3	3	3	12	12
	NI.1	3	3	3	3	12	12
	NI.1	3	3	3	3	12	12
	NI.2	3	3	3	3	12	12
	NI.2	3	3	3	3	12	12
	NI.2	3	3	3	3	12	12
	NI.3	3	3	3	3	12	12
	NI.3	3	3	3	3	12	12
	NI.3	3	3	3	3	12	12
	AI.1	3	3	3	3	12	12
	AI.1	3	3	3	3	12	12
	AI.1	2	2	missing	2	6	6
	AI.2	3	3	3	3	12	12
	AI.2	3	3	3	3	12	12
	AI.2	3	3	3	3	12	12
	AI.3	3	3	3	3	12	12
	AI.3	3	3	3	3	12	12
	AI.3	3	3	3	3	12	12
	AI.4	3	3	3	3	12	12
	AI.4	3	3	3	3	12	12
	AI.4	3	3	3	3	12	12
	AI.5	3	3	3	3	12	12
	AI.5	3	3	3	3	12	12
	AI.5	3	3	3	3	12	12
	AI.6	3	3	3	3	12	12
	AI.6	3	3	3	3	12	12
	AI.6	3	3	3	3	12	12
	H.1	3	3	3	3	12	12
	H.1	3	3	3	3	12	12
	H.1	3	3	3	3	12	12
	H.2	3	3	3	3	12	12
	H.2	3	3	3	3	12	12
	H.2	3	3	3	3	12	12
	H.3	3	3	3	3	12	12
	H.3	3	3	3	3	12	12
	H.3	3	3	3	3	12	12
	D.1	3	3	3	3	12	12
	D.1	3	3	3	3	12	12
	D.1	3	3	3	3	12	12
	D.2	2	2	2	0	6	12
	D.2	2	2	2	0	6	12
	D.2	2	2	2	0	6	12
	D.3	2	2	2	0	6	12
	D.3	2	2	2	0	6	12
	D.3	2	2	2	0	6	12
	C.P.32	3	3	3	3	12	12
	C.P.32	3	3	3	3	12	12
	C.P.32	3	3	3	3	12	12
				Total		534	570
				Reproducibility (CO)			93.6842

## Sheet: Blind-coded TM
	Taqman assay
	DNA aliquot samples (Das) and technical replicates	TM.Z	TM.A1	TM.A2	TM.B1	TM.B2	TM.C1	TM.C2	TM.D	TM.E	TM.F	TM.G			DNA aliquot samples (Das)	TM.Z	TM.A1	TM.A2	TM.B1	TM.B2	TM.C1	TM.C2	TM.D	TM.E	TM.F	TM.G
	NI.1	+	+	+	+	+	+	+	+	+	+	+			NI.1	+	+	+	+	+	+	+	+	+	+	+			N	Total number of tested technical replicates or Das
	NI.1	+	+	+	+	+	+	+	+	+	+	+			NI.2	+	+	+	+	+	+	+	+	+	+	+			N+	Number of technical replicates or Das for which the assigned value is positive, TP+FN
	NI.1	+	+	+	+	+	+	+	+	+	+	+			NI.3	+	+	+	+	+	+	+	+	+	+	+			N-	Number of technical replicates or Das for which the assigned value is negative, TN+FP
	NI.2	+	+	+	+	+	+	+	+	+	+	+			AI.1	+	+	+	+	+	+	+	+	+	+	+			TP	True positive, a positive result is obtained when a positive result is expected
	NI.2	+	+	+	+	+	+	+	+	+	+	+			AI.2	+	+	+	+	+	+	+	+	+	+	+			TN	True negative, a negative result is obtained when a negative result is expected
	NI.2	+	+	+	+	+	+	+	+	+	+	+			AI.3	+	+	+	+	+	+	+	+	+	+	+			FP	False positive, a positive result is obtained when a negative result is expected
	NI.3	+	+	+	+	+	+	+	+	+	+	+			AI.4	+	+	+	+	+	+	+	+	+	+	+			FN	False negative, a negative result is obtained when a positive result is expected
	NI.3	+	+	+	+	+	+	+	+	+	+	+			AI.5	+	+	+	+	+	+	+	+	+	+	+
	NI.3	+	+	+	+	+	+	+	+	+	+	+			AI.6	+	+	+	+	+	+	+	+	+	+	+			DSE	Diagnostic sensitivity, DSE = (NTP/N+)*100
	AI.1	+	+	+	+	+	+	+	+	+	+	+			H.1	-	-	-	-	-	-	-	-	-	-	-			DSP	Diagnostic specificity, DSP = (NTN/N-)*100
	AI.1	+	+	+	+	+	+	+	+	+	+	+			H.2	-	-	-	-	-	-	-	-	-	-	-			AC	Accuracy, AC = [(NTP+NTN)/N]*100
	AI.1	+	+	+	+	+	+	+	+	+	+	+			H.3	-	-	-	-	-	-	-	-	-	-	-
	AI.2	+	+	+	+	+	+	+	+	+	+	+			D.1	-	-	-	-	-	-	-	-	-	-	-
	AI.2	+	+	+	+	+	+	+	+	+	+	+			D.2	-	-	-	-	-	-	-	-	-	-	-
	AI.2	+	+	+	+	+	+	+	+	+	+	+			D.3	-	-	-	-	-	-	-	-	-	-	-
	AI.3	+	+	+	+	+	+	+	+	+	+	+			C.P.32	+	+	+	+	+	+	+	+	+	+	+
	AI.3	+	+	+	+	+	+	+	+	+	+	+
	AI.3	+	+	+	+	+	+	+	+	+	+	+				TM.Z	TM.A1	TM.A2	TM.B1	TM.B2	TM.C1	TM.C2	TM.D	TM.E	TM.F	TM.G	EG.global
	AI.4	+	+	+	+	+	+	+	+	+	+	+			N	16	16	16	16	16	16	16	16	16	16	16	176
	AI.4	+	+	+	+	+	+	+	+	+	+	+			N+	10	10	10	10	10	10	10	10	10	10	10	110
	AI.4	+	+	+	+	+	+	+	+	+	+	+			N-	6	6	6	6	6	6	6	6	6	6	6	66
	AI.5	+	+	+	+	+	+	+	+	+	+	+			TP	10	10	10	10	10	10	10	10	10	10	10	110
	AI.5	+	+	+	+	+	+	+	+	+	+	+			TN	6	6	6	6	6	6	6	6	6	6	6	66
	AI.5	+	+	+	+	+	+	+	+	+	+	+			FP	0	0	0	0	0	0	0	0	0	0	0	0
	AI.6	+	+	+	+	+	+	+	+	+	+	+			FN	0	0	0	0	0	0	0	0	0	0	0	0
	AI.6	+	+	+	+	+	+	+	+	+	+	+			DSE	100	100	100	100	100	100	100	100	100	100	100	100
	AI.6	+	+	+	+	+	+	+	+	+	+	+			DSP	100	100	100	100	100	100	100	100	100	100	100	100
	H.1	-	-	-	-	-	-	-	-	-	-	-			AC	100	100	100	100	100	100	100	100	100	100	100	100
	H.1	-	-	-	-	-	-	-	-	-	-	-
	H.1	-	-	-	-	-	-	-	-	-	-	-
	H.2	-	-	-	-	-	-	-	-	-	-	-			Reproducibility (CO)
	H.2	-	-	-	-	-	-	-	-	-	-	-				Number of interlaboratory pairs that gave the same results											Interlaboratory pairs of same results	Total number of interlaboratory pairs
	H.2	-	-	-	-	-	-	-	-	-	-	-
	H.3	-	-	-	-	-	-	-	-	-	-	-			DNA aliquot samples (Das)	TM.Z	TM.A1	TM.A2	TM.B1	TM.B2	TM.C1	TM.C2	TM.D	TM.E	TM.F	TM.G
	H.3	-	-	-	-	-	-	-	-	-	-	-			NI.1	10	10	10	10	10	10	10	10	10	10	10	110	110
	H.3	-	-	-	-	-	-	-	-	-	-	-			NI.2	10	10	10	10	10	10	10	10	10	10	10	110	110
	D.1	-	-	-	-	-	-	-	-	-	-	-			NI.3	10	10	10	10	10	10	10	10	10	10	10	110	110
	D.1	-	-	-	-	-	-	-	-	-	-	-			AI.1	10	10	10	10	10	10	10	10	10	10	10	110	110
	D.1	-	-	-	-	+	-	-	-	-	-	-			AI.2	10	10	10	10	10	10	10	10	10	10	10	110	110
	D.2	-	-	-	-	-	-	-	-	-	-	-			AI.3	10	10	10	10	10	10	10	10	10	10	10	110	110
	D.2	-	-	-	-	-	-	-	-	-	-	-			AI.4	10	10	10	10	10	10	10	10	10	10	10	110	110
	D.2	-	-	-	-	-	-	-	-	-	-	-			AI.5	10	10	10	10	10	10	10	10	10	10	10	110	110
	D.3	-	-	-	-	-	-	-	-	-	-	-			AI.6	10	10	10	10	10	10	10	10	10	10	10	110	110
	D.3	-	-	-	-	-	-	-	-	-	-	-			H.1	10	10	10	10	10	10	10	10	10	10	10	110	110
	D.3	-	-	-	-	+	-	-	-	-	-	-			H.2	10	10	10	10	10	10	10	10	10	10	10	110	110
	C.P.32	+	+	+	+	+	+	+	+	+	+	+			H.3	10	10	10	10	10	10	10	10	10	10	10	110	110
	C.P.32	+	+	+	+	+	+	+	+	+	+	+			D.1	10	10	10	10	10	10	10	10	10	10	10	110	110
	C.P.32	+	+	+	+	+	+	+	+	+	+	+			D.2	10	10	10	10	10	10	10	10	10	10	10	110	110
															D.3	10	10	10	10	10	10	10	10	10	10	10	110	110
		TM.Z	TM.A1	TM.A2	TM.B1	TM.B2	TM.C1	TM.C2	TM.D	TM.E	TM.F	TM.G	EG.global		C.P. 32	10	10	10	10	10	10	10	10	10	10	10	110	110
	N	48	48	48	48	48	48	48	48	48	48	48	528
	N+	30	30	30	30	30	30	30	30	30	30	30	330												Total		1760	1760
	N-	18	18	18	18	18	18	18	18	18	18	18	198												Reproducibility (CO)			100
	TP	30	30	30	30	30	30	30	30	30	30	30	330
	TN	18	18	18	18	16	18	18	18	18	18	18	196
	FP	0	0	0	0	2	0	0	0	0	0	0	2
	FN	0	0	0	0	0	0	0	0	0	0	0	0
	DSE	100	100	100	100	100	100	100	100	100	100	100	100
	DSP	100	100	100	100	88.8889	100	100	100	100	100	100	98.9899
	AC	100	100	100	100	95.8333	100	100	100	100	100	100	99.6212
	Reproducibility (CO)
		Number of interlaboratory pairs that gave the same results											Interlaboratory pairs of same results	Total number of interlaboratory pairs
	DNA aliquot samples (Das) and technical replicates	TM.Z	TM.A1	TM.A2	TM.B1	TM.B2	TM.C1	TM.C2	TM.D	TM.E	TM.F	TM.G
	NI.1	10	10	10	10	10	10	10	10	10	10	10	110	110
	NI.1	10	10	10	10	10	10	10	10	10	10	10	110	110
	NI.1	10	10	10	10	10	10	10	10	10	10	10	110	110
	NI.2	10	10	10	10	10	10	10	10	10	10	10	110	110
	NI.2	10	10	10	10	10	10	10	10	10	10	10	110	110
	NI.2	10	10	10	10	10	10	10	10	10	10	10	110	110
	NI.3	10	10	10	10	10	10	10	10	10	10	10	110	110
	NI.3	10	10	10	10	10	10	10	10	10	10	10	110	110
	NI.3	10	10	10	10	10	10	10	10	10	10	10	110	110
	AI.1	10	10	10	10	10	10	10	10	10	10	10	110	110
	AI.1	10	10	10	10	10	10	10	10	10	10	10	110	110
	AI.1	10	10	10	10	10	10	10	10	10	10	10	110	110
	AI.2	10	10	10	10	10	10	10	10	10	10	10	110	110
	AI.2	10	10	10	10	10	10	10	10	10	10	10	110	110
	AI.2	10	10	10	10	10	10	10	10	10	10	10	110	110
	AI.3	10	10	10	10	10	10	10	10	10	10	10	110	110
	AI.3	10	10	10	10	10	10	10	10	10	10	10	110	110
	AI.3	10	10	10	10	10	10	10	10	10	10	10	110	110
	AI.4	10	10	10	10	10	10	10	10	10	10	10	110	110
	AI.4	10	10	10	10	10	10	10	10	10	10	10	110	110
	AI.4	10	10	10	10	10	10	10	10	10	10	10	110	110
	AI.5	10	10	10	10	10	10	10	10	10	10	10	110	110
	AI.5	10	10	10	10	10	10	10	10	10	10	10	110	110
	AI.5	10	10	10	10	10	10	10	10	10	10	10	110	110
	AI.6	10	10	10	10	10	10	10	10	10	10	10	110	110
	AI.6	10	10	10	10	10	10	10	10	10	10	10	110	110
	AI.6	10	10	10	10	10	10	10	10	10	10	10	110	110
	H.1	10	10	10	10	10	10	10	10	10	10	10	110	110
	H.1	10	10	10	10	10	10	10	10	10	10	10	110	110
	H.1	10	10	10	10	10	10	10	10	10	10	10	110	110
	H.2	10	10	10	10	10	10	10	10	10	10	10	110	110
	H.2	10	10	10	10	10	10	10	10	10	10	10	110	110
	H.2	10	10	10	10	10	10	10	10	10	10	10	110	110
	H.3	10	10	10	10	10	10	10	10	10	10	10	110	110
	H.3	10	10	10	10	10	10	10	10	10	10	10	110	110
	H.3	10	10	10	10	10	10	10	10	10	10	10	110	110
	D.1	10	10	10	10	10	10	10	10	10	10	10	110	110
	D.1	10	10	10	10	10	10	10	10	10	10	10	110	110
	D.1	9	9	9	9	0	9	9	9	9	9	9	90	110
	D.2	10	10	10	10	10	10	10	10	10	10	10	110	110
	D.2	10	10	10	10	10	10	10	10	10	10	10	110	110
	D.2	10	10	10	10	10	10	10	10	10	10	10	110	110
	D.3	10	10	10	10	10	10	10	10	10	10	10	110	110
	D.3	10	10	10	10	10	10	10	10	10	10	10	110	110
	D.3	9	9	9	9	0	9	9	9	9	9	9	90	110
	C.P.32	10	10	10	10	10	10	10	10	10	10	10	110	110
	C.P.32	10	10	10	10	10	10	10	10	10	10	10	110	110
	C.P.32	10	10	10	10	10	10	10	10	10	10	10	110	110
												Total	5240	5280
												Reproducibility (CO)		99.2424

## Sheet: Blind-coded EG
	EvaGreen assay
	DNA aliquot samples (Das) and technical replicates	EG.Z	EG.D	EG.E	EG.F	EG.G			DNA aliquot samples (Das)	EG.Z	EG.D	EG.E	EG.F	EG.G
	NI.1	+	+	+	+	+			NI.1	+	+	+	+	+			N	Total number of tested technical replicates or Das
	NI.1	+	+	+	+	+			NI.2	+	+	+	+	+			N+	Number of technical replicates or Das for which the assigned value is positive, TP+FN
	NI.1	+	+	+	+	+			NI.3	+	+	+	+	+			N-	Number of technical replicates or Das for which the assigned value is negative, TN+FP
	NI.2	+	+	+	+	+			AI.1	+	+	+	+	+			TP	True positive, a positive result is obtained when a positive result is expected
	NI.2	+	+	+	+	+			AI.2	+	+	+	+	+			TN	True negative, a negative result is obtained when a negative result is expected
	NI.2	+	+	+	+	+			AI.3	+	+	+	+	+			FP	False positive, a positive result is obtained when a negative result is expected
	NI.3	+	+	+	+	+			AI.4	+	+	+	+	+			FN	False negative, a negative result is obtained when a positive result is expected
	NI.3	+	+	+	+	+			AI.5	+	+	+	+	+
	NI.3	+	+	+	+	+			AI.6	+	+	+	+	+			DSE	Diagnostic sensitivity, DSE = (NTP/N+)*100
	AI.1	+	+	+	+	+			H.1	-	-	-	-	-			DSP	Diagnostic specificity, DSP = (NTN/N-)*100
	AI.1	+	+	+	+	+			H.2	-	-	-	-	-			AC	Accuracy, AC = [(NTP+NTN)/N]*100
	AI.1	+	+	+	+	+			H.3	-	-	-	-	-
	AI.2	+	+	+	+	+			D.1	-	-	-	-	-
	AI.2	+	+	+	+	+			D.2	-	-	-	-	-
	AI.2	+	+	+	+	+			D.3	-	-	-	-	-
	AI.3	+	+	+	+	+			C.P.32	+	+	+	+	+
	AI.3	+	+	+	+	+
	AI.3	+	+	+	+	+				EG.Z	EG.D	EG.E	EG.F	EG.G	EG.global
	AI.4	+	+	+	+	+			N	16	16	16	16	16	80
	AI.4	+	+	+	+	+			N+	10	10	10	10	10	50
	AI.4	+	+	+	+	+			N-	6	6	6	6	6	30
	AI.5	+	+	+	+	+			TP	10	10	10	10	10	50
	AI.5	+	+	+	+	+			TN	6	6	6	6	6	30
	AI.5	+	+	+	+	+			FP	0	0	0	0	0	0
	AI.6	+	+	+	+	+			FN	0	0	0	0	0	0
	AI.6	+	+	+	+	+			DSE	100	100	100	100	100	100
	AI.6	+	+	+	+	+			DSP	100	100	100	100	100	100
	H.1	-	-	-	-	-			AC	100	100	100	100	100	100
	H.1	-	-	-	-	-
	H.1	-	-	-	-	-
	H.2	-	-	-	-	-			Reproducibility (CO)
	H.2	-	-	-	-	-				Number of interlaboratory pairs that gave the same results					Interlaboratory pairs of same results	Total number of interlaboratory pairs
	H.2	-	-	-	-	-
	H.3	-	-	-	-	-			DNA aliquot samples (Das)	EG.Z	EG.D	EG.E	EG.F	EG.G
	H.3	-	-	-	-	-			AI.1	4	4	4	4	4	20	20
	H.3	-	-	-	-	-			AI.2	4	4	4	4	4	20	20
	D.1	-	-	-	-	-			AI.3	4	4	4	4	4	20	20
	D.1	-	-	-	-	-			AI.4	4	4	4	4	4	20	20
	D.1	-	-	-	-	-			AI.5	4	4	4	4	4	20	20
	D.2	-	-	-	-	-			AI.6	4	4	4	4	4	20	20
	D.2	-	-	-	-	-			NI.2	4	4	4	4	4	20	20
	D.2	-	-	-	-	-			NI.3	4	4	4	4	4	20	20
	D.3	-	-	-	-	-			NI.1	4	4	4	4	4	20	20
	D.3	-	-	-	-	-			H.1	4	4	4	4	4	20	20
	D.3	-	-	-	-	-			H.3	4	4	4	4	4	20	20
	C.P.32	+	+	+	+	+			H.2	4	4	4	4	4	20	20
	C.P.32	+	+	+	+	+			D.1	4	4	4	4	4	20	20
	C.P.32	+	+	+	+	+			D.2	4	4	4	4	4	20	20
									D.3	4	4	4	4	4	20	20
		EG.Z	EG.D	EG.E	EG.F	EG.G	EG.global		C.P.32	4	4	4	4	4	20	20
	N	48	48	48	48	48	240
	N+	30	30	30	30	30	150							Total	320	320
	N-	18	18	18	18	18	90							Reproducibility (CO)		100
	TP	30	30	30	30	30	150
	TN	18	18	18	18	18	90
	FP	0	0	0	0	0	0
	FN	0	0	0	0	0	0
	DSE	100	100	100	100	100	100
	DSP	100	100	100	100	100	100
	AC	100	100	100	100	100	100
	Reproducibility (CO)
		Number of interlaboratory pairs that gave the same results					Interlaboratory pairs of same results	Total number of interlaboratory pairs
	DNA aliquot samples (Das) and technical replicates	EG.Z	EG.D	EG.E	EG.F	EG.G
	NI.1	4	4	4	4	4	20	20
	NI.1	4	4	4	4	4	20	20
	NI.1	4	4	4	4	4	20	20
	NI.2	4	4	4	4	4	20	20
	NI.2	4	4	4	4	4	20	20
	NI.2	4	4	4	4	4	20	20
	NI.3	4	4	4	4	4	20	20
	NI.3	4	4	4	4	4	20	20
	NI.3	4	4	4	4	4	20	20
	AI.1	4	4	4	4	4	20	20
	AI.1	4	4	4	4	4	20	20
	AI.1	4	4	4	4	4	20	20
	AI.2	4	4	4	4	4	20	20
	AI.2	4	4	4	4	4	20	20
	AI.2	4	4	4	4	4	20	20
	AI.3	4	4	4	4	4	20	20
	AI.3	4	4	4	4	4	20	20
	AI.3	4	4	4	4	4	20	20
	AI.4	4	4	4	4	4	20	20
	AI.4	4	4	4	4	4	20	20
	AI.4	4	4	4	4	4	20	20
	AI.5	4	4	4	4	4	20	20
	AI.5	4	4	4	4	4	20	20
	AI.5	4	4	4	4	4	20	20
	AI.6	4	4	4	4	4	20	20
	AI.6	4	4	4	4	4	20	20
	AI.6	4	4	4	4	4	20	20
	H.1	4	4	4	4	4	20	20
	H.1	4	4	4	4	4	20	20
	H.1	4	4	4	4	4	20	20
	H.2	4	4	4	4	4	20	20
	H.2	4	4	4	4	4	20	20
	H.2	4	4	4	4	4	20	20
	H.3	4	4	4	4	4	20	20
	H.3	4	4	4	4	4	20	20
	H.3	4	4	4	4	4	20	20
	D.1	4	4	4	4	4	20	20
	D.1	4	4	4	4	4	20	20
	D.1	4	4	4	4	4	20	20
	D.2	4	4	4	4	4	20	20
	D.2	4	4	4	4	4	20	20
	D.2	4	4	4	4	4	20	20
	D.3	4	4	4	4	4	20	20
	D.3	4	4	4	4	4	20	20
	D.3	4	4	4	4	4	20	20
	C.P.32	4	4	4	4	4	20	20
	C.P.32	4	4	4	4	4	20	20
	C.P.32	4	4	4	4	4	20	20
						Total	960	960
						Reproducibility (CO)		100

## Sheet: Analytical sensitivity
		TM = Taqman; EG = EvaGreen; SG = SYBR Green
																				Reproducibility (CO) at 15fg
		C.P. 32 15fg																			CER32 15fg																					N	Total number of tested replicates
		TM.Z	TM.A1	TM.A2	TM.B	TM.C	TM.E	TM.F	TM.G		EG.Z	EG.E		SG.Z	SG.H1	SG.H2					Number of interlaboratory pairs that gave the same results								Interlaboratory pairs of same results	Total number of interlaboratory pairs	Number of interlaboratory pairs that gave the same results		Interlaboratory pairs of same results	Total number of interlaboratory pairs	Number of interlaboratory pairs that gave the same results			Interlaboratory pairs of same results	Total number of interlaboratory pairs			N+	Number of replicates for which the assigned value is positive, TP+FN
	Replicate 1	+	+	+	+	+	+	+	+		+	+		+	+	+																										N-	Number of replicates for which the assigned value is negative, TN+FP
	Replicate 2	+	+	+	+	+	+	-	-		+	+		+	+	+					TM.Z	TM.A1	TM.A2	TM.B	TM.C	TM.E	TM.F	TM.G			EG.Z	EG.E			SY.Z	SY.H2	SY.H1					TP	True positive, a positive result is obtained when a positive result is expected
	Replicate 3	+	+	+	+	+	+	+	+		+	+		+	+	+				Replicate 1	+	+	+	+	+	+	+	+			+	+			+	+	+					TN	True negative, a negative result is obtained when a negative result is expected
	Replicate 4	+	+	+	+	+	+	+	+		+	+		+	+	+				Replicate 2	+	+	+	+	+	+	-	-			+	+			+	+	+					FP	False positive, a positive result is obtained when a negative result is expected
	Replicate 5	+	+	+	+	+	+	+	+		+	+		+	+	+				Replicate 3	+	+	+	+	+	+	+	+			+	+			+	+	+					FN	False negative, a negative result is obtained when a positive result is expected
	Replicate 6	+	+	+	+	+	+	+	+		+	+		+	+	+				Replicate 4	+	+	+	+	+	+	+	+			+	+			+	+	+
																				Replicate 5	+	+	+	+	+	+	+	+			+	+			+	+	+					DSE	Diagnostic sensitivity, DSE = (NTP/N+)*100
		TM.Z	TM.A1	TM.A2	TM.B	TM.C	TM.E	TM.F	TM.G	TM.global	EG.Z	EG.E	EG.global	SG.Z	SG.H1	SG.H2	SG.global			Replicate 6	+	+	+	+	+	+	+	+			+	+			+	+	+					DA	Repeatability, (NTP/N)2 + (NTN/N)2
	N	6	6	6	6	6	6	6	6	48	6	6	12	6	6	6	18																									AC	Accuracy, AC = [(NTP+NTN)/N]*100
	N+	6	6	6	6	6	6	6	6	48	6	6	12	6	6	6	18			Replicate 1	7	7	7	7	7	7	7	7	56	56	1	1	2	2	2	2	2	6	6
	N-	0	0	0	0	0	0	0	0	0	0	0	0	0	0	0	0			Replicate 2	5	5	5	5	5	5	1	1	32	56	1	1	2	2	2	2	2	6	6
	TP	6	6	6	6	6	6	5	5	46	6	6	12	6	6	6	18			Replicate 3	7	7	7	7	7	7	7	7	56	56	1	1	2	2	2	2	2	6	6
	TN	0	0	0	0	0	0	0	0	0	0	0	0	0	0	0	0			Replicate 4	7	7	7	7	7	7	7	7	56	56	1	1	2	2	2	2	2	6	6
	FP	0	0	0	0	0	0	0	0	0	0	0	0	0	0	0	0			Replicate 5	7	7	7	7	7	7	7	7	56	56	1	1	2	2	2	2	2	6	6
	FN	0	0	0	0	0	0	1	1	2	0	0	0	0	0	0	0			Replicate 6	7	7	7	7	7	7	7	7	56	56	1	1	2	2	2	2	2	6	6
	DSE	100	100	100	100	100	100	83.3333	83.3333	95.8333	100	100	100	100	100	100	100
	DA	1	1	1	1	1	1	0.694444	0.694444	N.E.*	1	1	N.E.*	1	1	1	N.E.*											Total	312	336		Total	12	12			Total	36	36
	AC	100	100	100	100	100	100	83.3333	83.3333	95.8333	100	100	100	100	100	100	100											Reproducibility (CO)		92.8571		Reproducibility (CO)		100			Reproducibility (CO)		100
	*N.E. Not expected
	DSP is not calculated as samples with negative assigned value are not included in the analytical sensitivity test
																				Reproducibility (CO) at 3fg
		C.P. 32 3fg																			CER32 3fg
		TM.Z	TM.A1	TM.A2	TM.B	TM.C	TM.E	TM.F	TM.G		EG.Z	EG.E		SG.Z	SG.H1	SG.H2					Number of interlaboratory pairs that gave the same results								Interlaboratory pairs of same results	Total number of interlaboratory pairs	Number of interlaboratory pairs that gave the same results		Interlaboratory pairs of same results	Total number of interlaboratory pairs	Number of interlaboratory pairs that gave the same results			Interlaboratory pairs of same results	Total number of interlaboratory pairs
	Replicate 1	+	+	+	+	+	+	-	+		+	+		+	+	+
	Replicate 2	+	+	-	+	+	+	+	+		+	+		+	+	+					TM.Z	TM.A1	TM.A2	TM.B	TM.C	TM.E	TM.F	TM.G			EG.Z	EG.E			SY.Z	SY.H2	SY.H1
	Replicate 3	+	-	+	+	+	-	+	+		+	+		+	+	+				Replicate 1	+	+	+	+	+	+	-	+			+	+			+	+	+
	Replicate 4	+	-	+	+	+	+	+	+		+	+		+	+	+				Replicate 2	+	+	-	+	+	+	+	+			+	+			+	+	+
	Replicate 5	+	-	+	+	+	+	+	+		+	+		+	+	+				Replicate 3	+	-	+	+	+	-	+	+			+	+			+	+	+
	Replicate 6	+	+	+	+	+	+	+	+		+	+		+	+	+				Replicate 4	+	-	+	+	+	+	+	+			+	+			+	+	+
																				Replicate 5	+	-	+	+	+	+	+	+			+	+			+	+	+
		TM.Z	TM.A1	TM.A2	TM.B	TM.C	TM.E	TM.F	TM.G	TM.global	EG.Z	EG.E	EG.global	SG.Z	SG.H1	SG.H2	SG.global			Replicate 6	+	+	+	+	+	+	+	+			+	+			+	+	+
	N	6	6	6	6	6	6	6	6	48	6	6	12	6	6	6	18
	N+	6	6	6	6	6	6	6	6	48	6	6	12	6	6	6	18			Replicate 1	6	6	6	6	6	6	0	6	42	56	1	1	2	2	2	2	2	6	6
	N-	0	0	0	0	0	0	0	0	0	0	0	0	0	0	0	0			Replicate 2	6	6	0	6	6	6	6	6	42	56	1	1	2	2	2	2	2	6	6
	TP	6	3	5	6	6	5	5	6	42	6	6	12	6	6	6	18			Replicate 3	5	1	5	5	5	1	5	5	32	56	1	1	2	2	2	2	2	6	6
	TN	0	0	0	0	0	0	0	0	0	0	0	0	0	0	0	0			Replicate 4	6	0	6	6	6	6	6	6	42	56	1	1	2	2	2	2	2	6	6
	FP	0	0	0	0	0	0	0	0	0	0	0	0	0	0	0	0			Replicate 5	6	0	6	6	6	6	6	6	42	56	1	1	2	2	2	2	2	6	6
	FN	0	3	1	0	0	1	1	0	6	0	0	0	0	0	0	0			Replicate 6	7	7	7	7	7	7	7	7	56	56	1	1	2	2	2	2	2	6	6
	DSE	100	50	83.3333	100	100	83.3333	83.3333	100	87.5	100	100	100	100	100	100	100
	DA	1	0.25	0.694444	1	1	0.694444	0.694444	1	N.E.*	1	1	N.E.*	1	1	1	N.E.*											Total	256	336		Total	12	12			Total	36	36
	AC	100	50	83.3333	100	100	83.3333	83.3333	100	87.5	100	100	100	100	100	100	100											Reproducibility (CO)		76.1905		Reproducibility (CO)		100			Reproducibility (CO)		100
	*N.E. Not expected
	DSP is not calculated as samples with negative assigned value are not included in the analytical sensitivity test
